# Supplementary material
Source: Springer Nature journal article supplement (https://www.springermedizin.de/resource/supplementary/12889_2013_5846_MOESM9_ESM.pdf/9496258)

Number of Articles

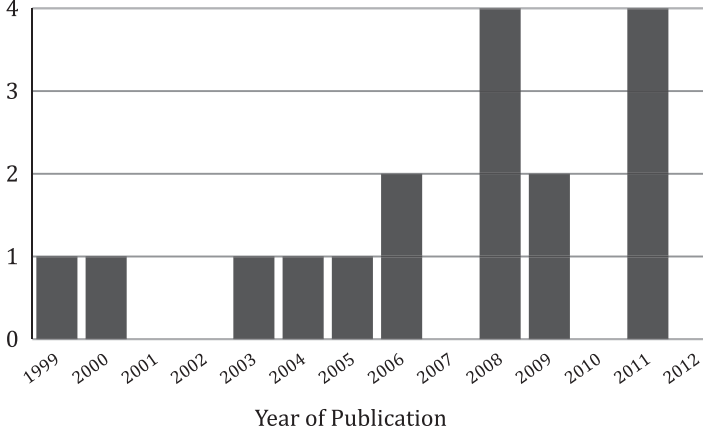

Supplement: MOESM9 [file 9496258]
